# Supplementary material for: Identification of volasertib-resistant mechanism and evaluation of combination effects with volasertib and other agents on acute myeloid leukemia
Source: Oncotarget. 2017 Jul 26;8(45):78452–65. doi: 10.18632/oncotarget.19632 (PMC5667974; doi:10.18632/oncotarget.19632)
Supplement: Supplementary file 1 [file oncotarget-08-78452-s001.pdf]

# Identification of volasertib-resistant mechanism and evaluation of combination effects with volasertib and other agents on acute myeloid leukemia

## SUPPLEMENTARY MATERIALS

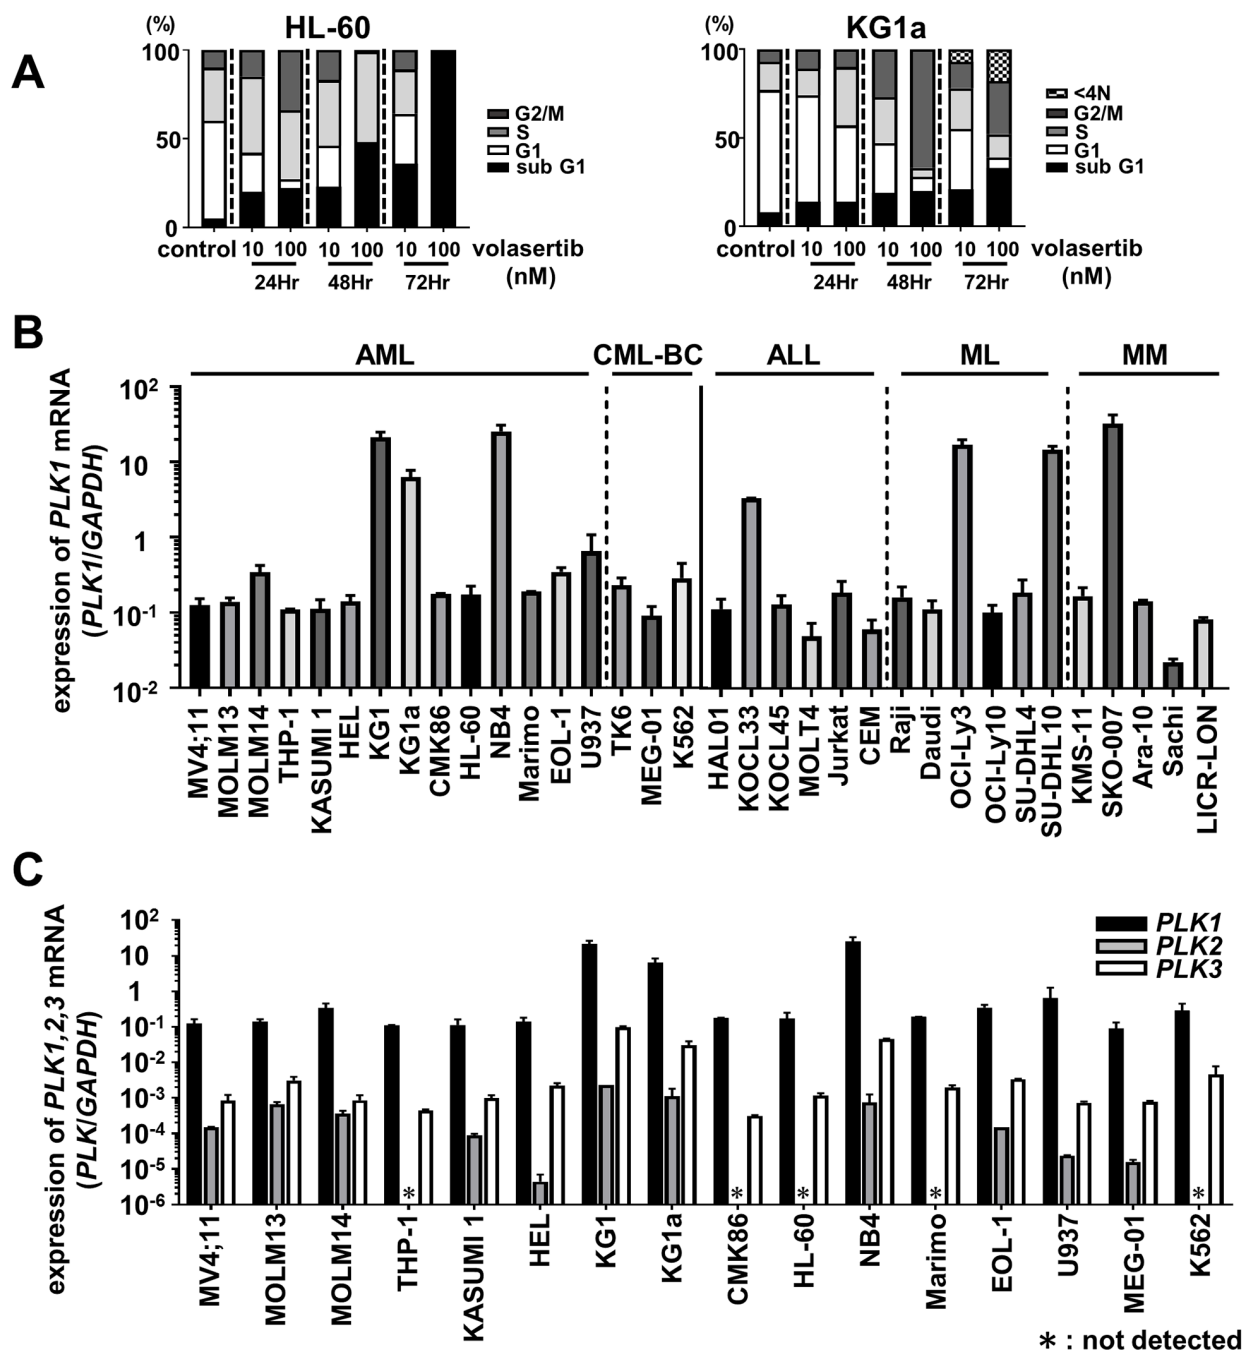

**Supplementary Figure 1:** (A) Bar graphs showed the percentages of cells in G1, S and G2/M cell cycle at the indicated point after volasertib administration. (B) The expression of *PLK1* mRNA in a series of human hematological malignant cell lines. (C) The expressions of *PLK1*, *PLK2*, and *PLK3* mRNA in AML cell lines.

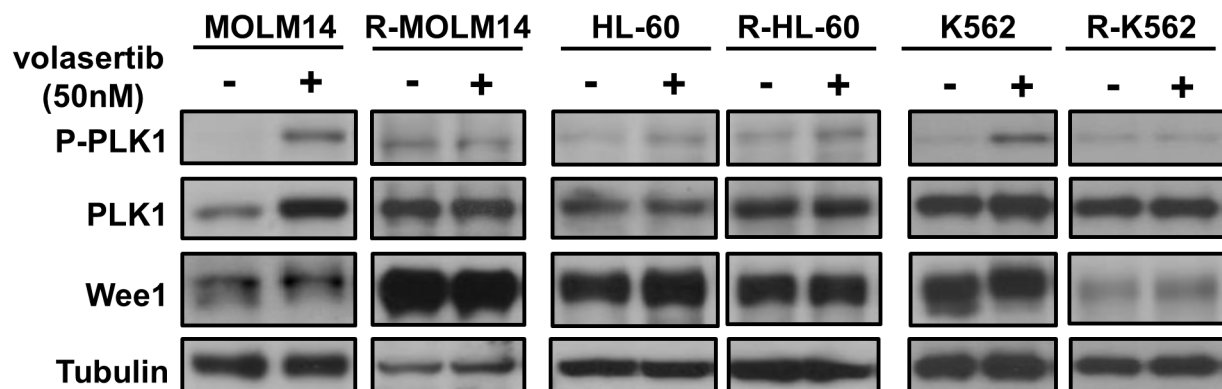

**Supplementary Figure 2:** The protein expressions of PLK1 and Wee1 were evaluated western blot analysis. Both parental and volasertib-resistant cells were treated with 50 nM volasertib for 18 hours.

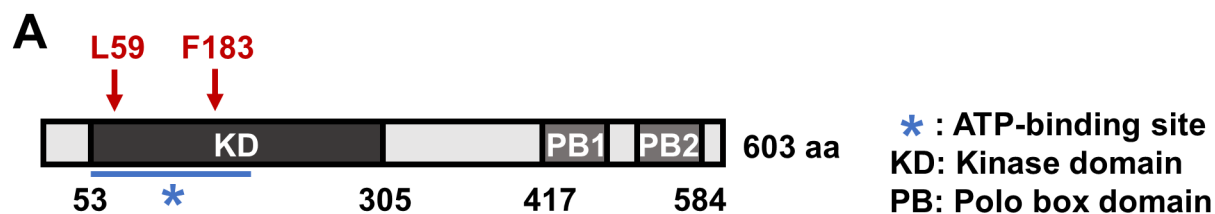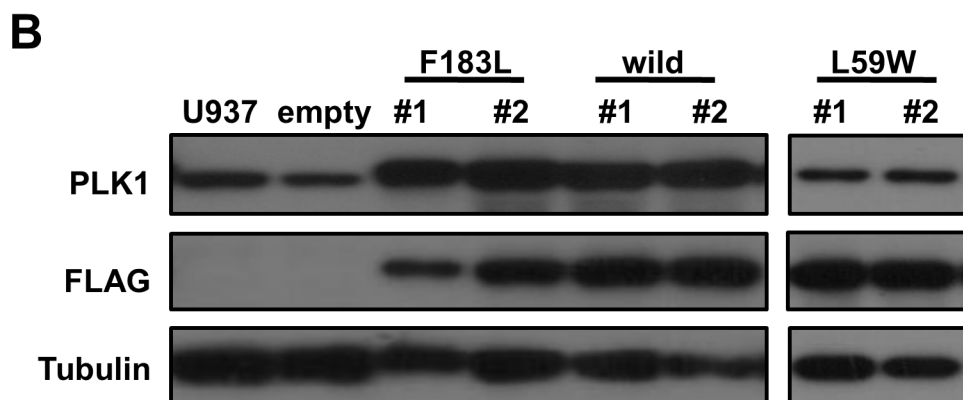

**Supplementary Figure 3:** (A) The schematic diagram of PLK1 protein. The mutated amino acid residues in volasertib-resistant cells were indicated by red arrows. (B) The protein expressions of PLK1 proteins were assessed by western blot analysis with anti-PLK1 and anti-FLAG antibodies.

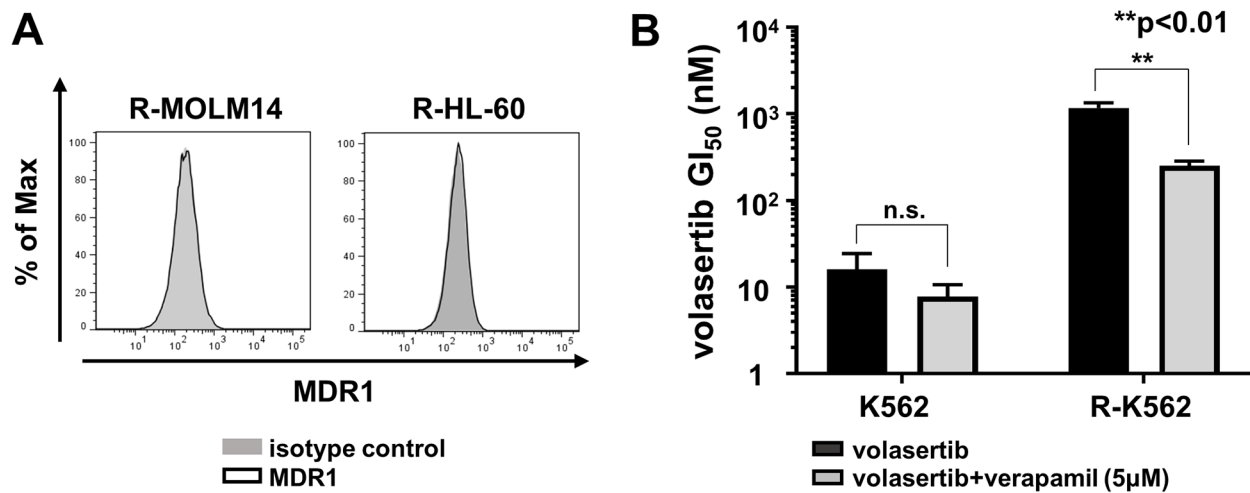

**Supplementary Figure 4:** (A) The expressions of MDR1 were examined by FCM in volasertib-resistant R-MOLM14 and R-HL-60 cells. (B) The  $GI_{50}$  values of volasertib in K562 and volasertib-resistant R-K562 cells with or without verapamil. Error bars represent the mean values  $\pm$  S.D. of at least three independent experiments.

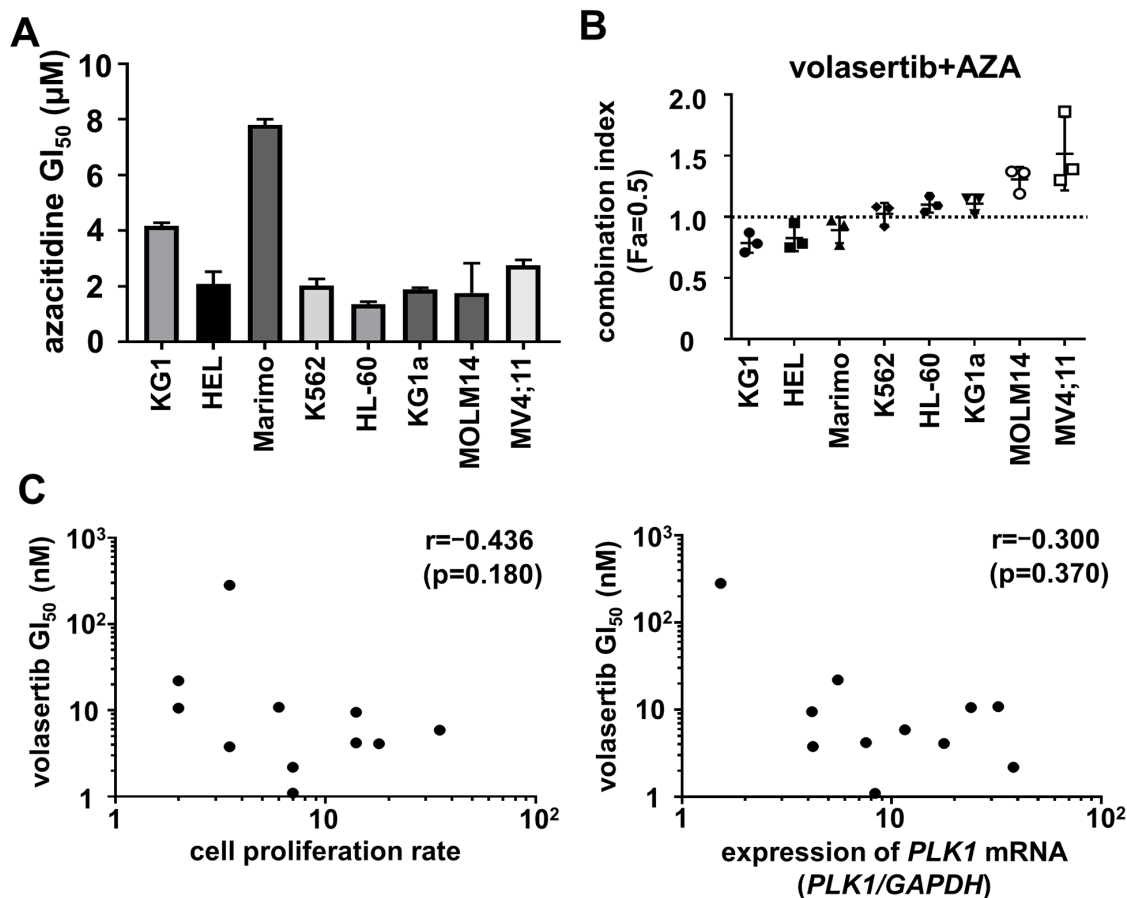

**Supplementary Figure 5:** (A)  $GI_{50}$  values of AZA in indicated cell lines. (B) The combination index (Fa=0.5) of volasertib and AZA was calculated using CompuSyn software. Error bars represent the mean  $\pm$  S.D. of at least three independent experiments. (C) The correlation between the  $GI_{50}$  values of volasertib, and cell proliferation rate (left panel) and *PLK1* mRNA expression (right panel) in each AML cells. The correlation coefficient was determined by the Spearman's rank correlation coefficient.

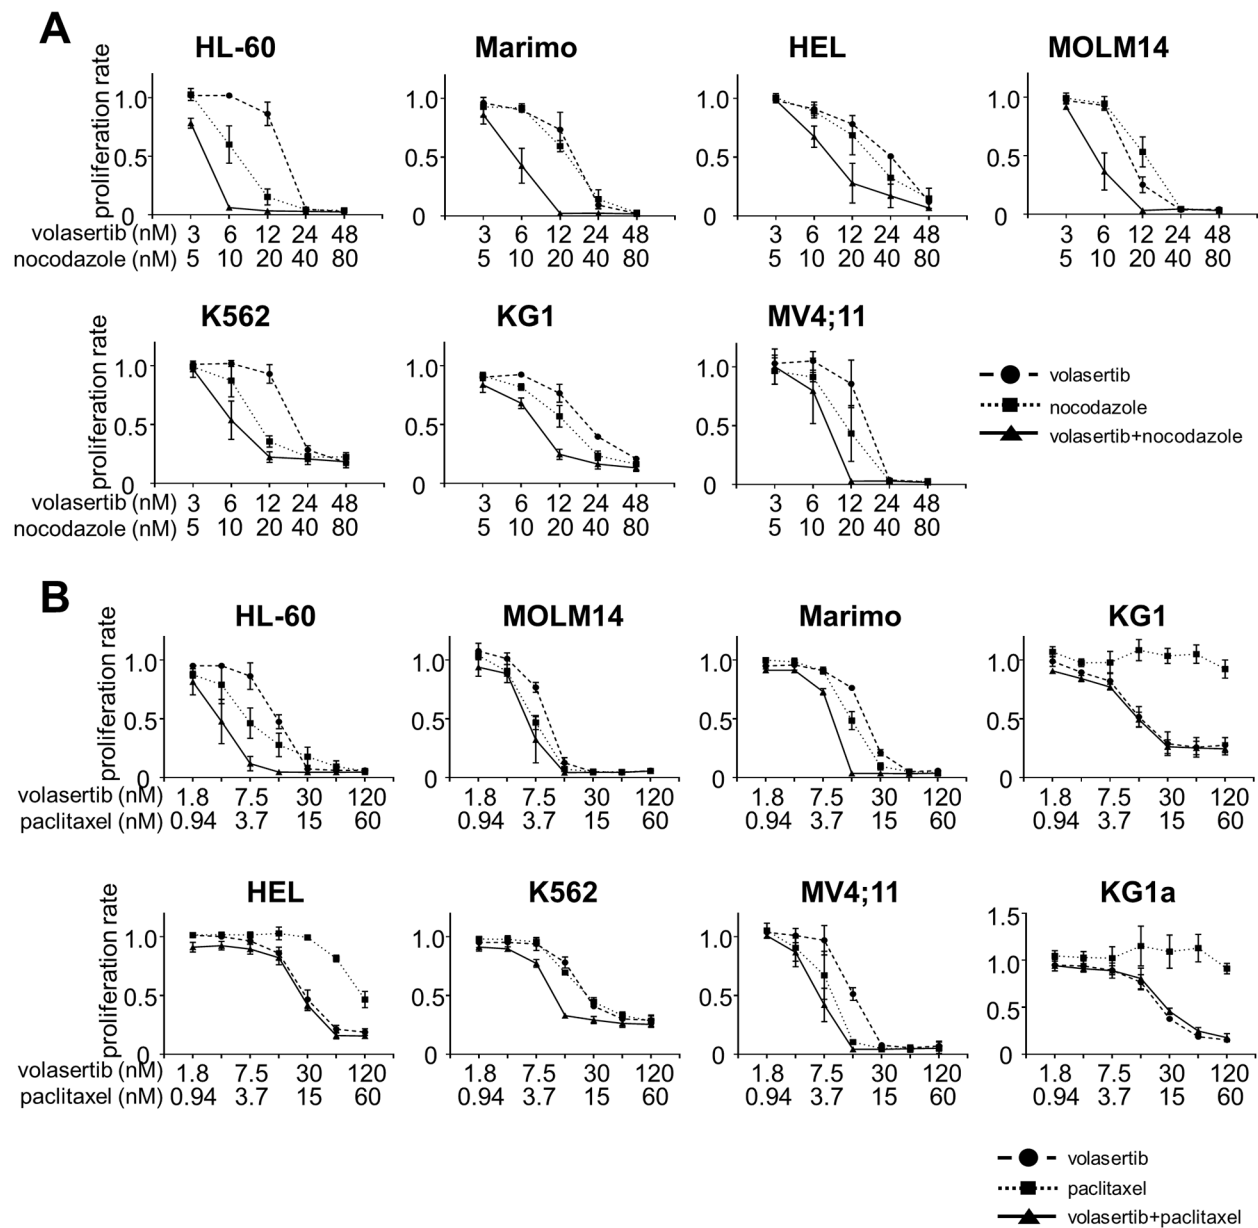

**Supplementary Figure 6:** The proliferation curves of myeloid leukemia cell lines in the combination with volasertib and nocodazole (A), or volasertib and paclitaxel (B). Error bars represent the mean values  $\pm$  S.D. of at least three independent experiments.

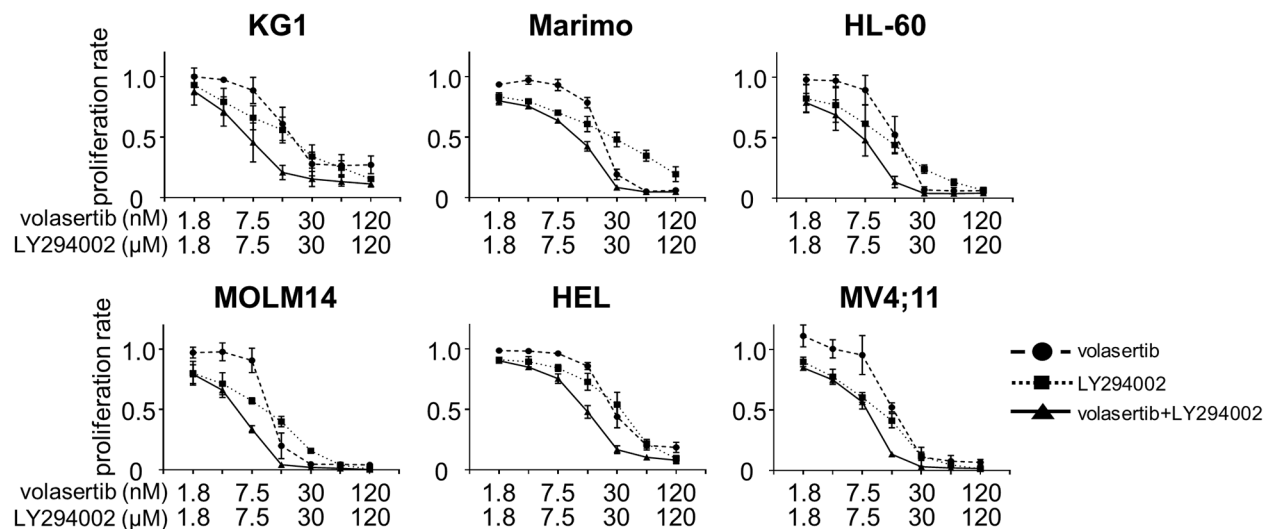

**Supplementary Figure 7: The proliferation curves of myeloid leukemia cell lines in the combination with volasertib and LY294002.**

**Supplementary Table 1: Characteristics of the patient samples in this study**

| Patient No. | WHO classification | Status    | Karyotype                                | Mutations         |
|-------------|--------------------|-----------|------------------------------------------|-------------------|
| #1          | AML, NOC           | Diagnosis | Normal                                   |                   |
| #2          | AML, NOC           | Diagnosis | Normal                                   | <i>NPM1, IDH1</i> |
| #3          | AML with MRC       | Relapse   | Complex (including -5, -7)               |                   |
| #4          | AML with MRC       | Relapse   | Complex (including -17)                  | <i>TP53, JAK2</i> |
| #5          | tMN                | Diagnosis | Complex (including -5,-7)                |                   |
| #6          | AML, NOC           | Diagnosis | Normal                                   | <i>FLT3-KDM</i>   |
| #7          | AML with MRC       | Diagnosis | Normal                                   | <i>IDH1</i>       |
| #8          | tMN                | Relapse   | 46,XX,t(11;19)<br>(q23;p13;1),i(17)(q10) |                   |
| #9          | AML, NOC           | Diagnosis | Normal                                   | <i>NRAS</i>       |
| #10         | AML, NOC           | Diagnosis | Normal                                   | <i>FLT3-KDM</i>   |
| #11         | AML with MRC       | Relapse   | 46,X,der(Y)t(Y;1)(q12;q12)               | <i>IDH2</i>       |
| #12         | AML, NOC           | Diagnosis | Normal                                   |                   |
| #13         | AML, NOC           | Diagnosis | Complex(including -5, -17)               | <i>IDH2</i>       |

NOC, not otherwise categorized; MRC, myelodysplasia related change; tMN, therapy related neoplasm
